# Supplementary material for: Comparative Transcriptome Profiling of the Early Infection of Wheat Roots by Gaeumannomyces graminis var. tritici
Source: PubMed Central journal article supplement (PMC4397062; doi:10.1371/journal.pone.0120691), 2015-04-14
Supplement: pone.0120691.s004.pdf [file pone.0120691.s004.pdf]

**S2 Table** Alternative splicing (AS) events of *Ggt* culture and *Ggt*-infected wheat roots.

| AS event | Number of mapped reads           |                      |
|----------|----------------------------------|----------------------|
|          | <i>Ggt</i> -infected wheat roots | <i>Ggt</i> -cultures |
| TSS      | 10,393                           | 10,831               |
| TTS      | 10,329                           | 10,745               |
| SKIP     | 62                               | 76                   |
| XSKIP    | 66                               | 78                   |
| MSKIP    | 6                                | 8                    |
| XMSKIP   | 4                                | 10                   |
| IR       | 678                              | 782                  |
| XIR      | 1026                             | 1076                 |
| MIR      | 108                              | 108                  |
| XMIR     | 226                              | 240                  |
| AE       | 357                              | 367                  |
| XAE      | 155                              | 177                  |

The types of AS events are: TSS: alternative splicing of the first exon at transcription start site ; TTS: alternative splicing of last exon at transcription terminal site, SKIP: exon skipping (in this case, an exon may be spliced out of the primary transcript or retained); XSKIP: approximate exon skipping (XSKIP\_ON,XSKIP\_OFF pair); MSKIP: multiple exon skipping (MSKIP\_ON, MSKIP\_OFF pair); XMSKIP: Approximate Multiple exon skipping (XMSKIP\_ON,XMSKIP\_OFF pair); IR: Intron retention (A sequence may be spliced out as an intron or simply retained); XIR: Approximate Intron retention (XIR\_ON, XIR\_OFF pair); MIR: Multiple Intron retention (MIR\_ON, MIR\_OFF pair); XMIR: Approximate Multiple Intron retention (XMIR\_ON, XMIR\_OFF pair); AE: Alternative exon ends (5', 3', or both); XAE: Approximate Alternative exon ends.
